# Supplementary material for: Salvia miltiorrhiza Extract and Individual Synthesized Component Derivatives Induce Activating-Transcription-Factor-3-Mediated Anti-Obesity Effects and Attenuate Obesity-Induced Metabolic Disorder by Suppressing C/EBPα in High-Fat-Induced Obese Mice
Source: MDPI journal article supplement (doi:10.3390/cells11061022), 2022-03-17
Supplement: s1 [file s1]

**Table S1. Primers**

| <b>mouse primers for Real-time PCR</b>  |                                  |                                  |
|-----------------------------------------|----------------------------------|----------------------------------|
| <b>Gene name</b>                        | <b>Forward Primer 5'-3'</b>      | <b>Reverse Primer 5'-3'</b>      |
| ATF3                                    | 5'CTCCTgggTCACTggTATTTg3'(21)    | 5'CCgATggCAGAggTgTTTAT3'(20)     |
| C/EBP $\alpha$                          | 5'TggACAAgAACAgCAACgAgTAC3'(23)  | 5'gCAGTTgCCCATggCCTTgAC3'(21)    |
| PPAR $\gamma$ 2                         | 5'TggAgCCTAAgTTTgAgTTTgC3'(22)   | 5'CAggTTgTCTTggATgTCCTC3'(21)    |
| FABP4                                   | 5'gCTCCTCCTCgAAggTTTAC3'(20)     | 5'CCCACTCCCACTTCTTTCAT3'(20)     |
| Resistin                                | 5'CTAAgCTgAgggTCTggAAATg3'(22)   | 5'CACACACCCTTCTCCACTAAAg3'(22)   |
| FAS                                     | 5'AgACCCgAACTCCAAGTTATTC3'(22)   | 5'gCAGCTCCTTgTATACTTCTCC3'(22)   |
| SCD1                                    | 5'ggTggAAGAAgTgAgCgAATAg3'(22)   | 5'gCgTgggCAGgATgAAg3'(17)        |
| ChREBP                                  | 5'TgTTCAGCATCCTCATCCgACCTT3'(24) | 5'TgAgTTggCgAAgggAATTCAGgA3'(24) |
| ATGL                                    | 5'TAgCTAACAgTTgggCTTCAC3'(21)    | 5'CAGAgAgAACAgAgCAGCTTAC3'(22)   |
| HSL                                     | 5'CATCAACCACTgTgAgggTAAg3'(22)   | 5'AAgggAggTgAgATggTAACT3'(21)    |
| MGL                                     | 5'gACAgAAAgAgTgTgggAAgAg3'(22)   | 5'CTgAgCACAgTAGTCTggAATg3'(22)   |
| Cpt1 $\alpha$                           | 5'gAAgTgTCggCAGACCTATTT3'(21)    | 5'gTCCTCCTCTCTATATCCCTgTT3'(23)  |
| HSP70                                   | 5'TggTgCTgACgAAgATgAAg3'(20)     | 5'CgCTgAgAgTCgTTgAggTAG3'(21)    |
| UCP1                                    | 5'gAggTCgTgAAggTCAGAAAg3'(21)    | 5'AAgCTTTCTgTggTggCTATAA3'(22)   |
| Zic1                                    | 5'ATATgCgCCAACCCATCAA3'(19)      | 5'TCgTgCATggTgCTgAAA3'(18)       |
| CIDEA                                   | 5'gCAACCAAAgAAATCgggAATAg3'(23)  | 5'CTCgTACATCgTggCTTTgA3'(20)     |
| Elovl3                                  | 5'TACATCTggAggCAGgAgAA3'(20)     | 5'ggTggAAgAAgTgAgCgAATAg3'(22)   |
| Tbx1                                    | 5'CCCgATTCCATgTTgTCTATgT3'(22)   | 5'gTgAAgCgTgTCTCCTCAAA3'(20)     |
| Cox4-1                                  | 5'AgTTgTACCgCATCCAgTTT3'(20)     | 5'gCAGTgAAgCCAATgAAgAAC3'(21)    |
| Cox4-2                                  | 5'ACgAATggAAgACAgTgATgg3'(21)    | 5'gTCAGggTgACAACCTTCTTAG3'(22)   |
| CHOP                                    | 5'CCCAGgAAACgAAgAggAAg3'(20)     | 5'gAACTCTgACTggAATCTggAg3'(22)   |
| GAPDH                                   | 5'ggAgCCAAACgggTCATCATCTC3'(23)  | 5'gAggggCCATCCACAgTCTTCT3'(22)   |
| <b>mouse Primers for ChIP assay.</b>    |                                  |                                  |
| <b>CEBP<math>\alpha</math> promoter</b> | <b>Forward Primer 5'-3'</b>      | <b>Reverse Primer 5'-3'</b>      |
| Primer 1                                | 5'CgCCgCCggggTggggCTgAgC3'       | 5'TggTgTCCAAACgggTCTCggA3'       |
| Primer 2                                | 5'CAgCAGACCTCCCTAACAgTTT3'       | 5'gCACCCCgAAgACCGCggCTTC3'       |
| Primer 3                                | 5'CTTTggTgTCCCCCTCTATgAT3'       | 5'TCTCCAgTCgCTgACAgAATCC3'       |
